# Supplementary material for: Transcriptomic analysis of bovine endometrial epithelial cells in response to interferon tau and hormone stimulation
Source: Front Vet Sci. 2024 Feb 2;11:1344259. doi: 10.3389/fvets.2024.1344259 (PMC10873918; doi:10.3389/fvets.2024.1344259)
Supplement: Supplementary file 9 [file Table_7.XLSX]

## Sheet: GB vs CON
Supplementary Table 7. KEGG enrichment analysis of DEGs in GB vs CON group
PathwayID	Pathway	pvalue	p.adjust	Gene
ko05168	Herpes simplex infection	1.9e-19	5.3e-17	gene-OAS2/gene-IFIT2/gene-OAS1Z/gene-IFIH1/gene-OAS1X/gene-OAS1Y/gene-XAF1/gene-IFIT3/gene-DDX58/gene-LOC100139670/gene-TAP1/gene-SP100/gene-BOLA-DMB/gene-SP140/gene-BOLA-NC1/gene-BoLA/gene-SP140L/gene-LOC512672/gene-IFIT5/gene-SP110/gene-PML/gene-EIF2AK2/gene-BOLA/gene-CASP8/gene-IRF7/gene-RNASEL/gene-JSP.1/gene-LOC616942/gene-IRF9/gene-LOC618733/gene-STAT1/gene-TAP2/gene-STAT2/gene-MR1/gene-NEC…
ko04621	NOD-like receptor signaling pathway	5.17e-14	7.21e-12	gene-OAS2/gene-OAS1Z/gene-LOC507055/gene-LOC100336669/gene-OAS1X/gene-OAS1Y/gene-LOC783920/gene-GBP5/gene-LOC512486/gene-LOC100336443/gene-LOC781710/gene-GBP6/gene-GBP4/gene-XAF1/gene-LOC511531/gene-IFI16/gene-RBM43/gene-LOC783604/gene-CASP8/gene-IRF7/gene-CASP4/gene-RNASEL/gene-NAMPT/gene-IRF9/gene-STAT1/gene-STAT2/gene-RBCK1/gene-TLR4/gene-CCL2/gene-RIPK3/gene-P2RX7/gene-IRF3/gene-GSDMD/gene-IL…
ko05164	Influenza A	1.64e-08	1.52e-06	gene-MX2/gene-OAS2/gene-RSAD2/gene-TNFSF10/gene-OAS1Z/gene-IFIH1/gene-OAS1X/gene-MX1/gene-OAS1Y/gene-DDX58/gene-BOLA-DMB/gene-PML/gene-EIF2AK2/gene-IRF7/gene-RNASEL/gene-ADAR/gene-IRF9/gene-STAT1/gene-STAT2/gene-TLR4/gene-TRIM25/gene-CCL2/gene-TLR3/gene-IRF3/gene-IL18/gene-IFNAR1
ko04612	Antigen processing and presentation	9.48e-08	6.61e-06	gene-TAP1/gene-BOLA-DMB/gene-BOLA-NC1/gene-BoLA/gene-LOC512672/gene-BOLA/gene-PSME2/gene-JSP.1/gene-LOC616942/gene-TAPBPL/gene-LOC618733/gene-TAP2/gene-B2M/gene-CTSS/gene-PSME1/gene-MR1/gene-TAPBP
ko05170	Human immunodeficiency virus 1 infection	1.2e-07	6.69e-06	gene-LOC618737/gene-XAF1/gene-LOC112441507/gene-LOC100298356/gene-LOC516599/gene-TAP1/gene-BOLA-NC1/gene-BoLA/gene-LOC512672/gene-CGAS/gene-LOC616948/gene-BOLA/gene-CASP8/gene-LOC786870/gene-JSP.1/gene-LOC616942/gene-TAPBPL/gene-APOBEC3H/gene-LOC618733/gene-CXCR4/gene-TAP2/gene-B2M/gene-CUL4B/gene-MR1/gene-TLR4/gene-CALN1/gene-TAPBP/gene-IRF3/gene-TLR2/gene-APOBEC3Z2/gene-AP1S3/gene-FAM212A
ko05160	Hepatitis C	1.87e-07	8.67e-06	gene-OAS2/gene-IFIT2/gene-OAS1Z/gene-OAS1X/gene-OAS1Y/gene-XAF1/gene-IFIT3/gene-DDX58/gene-LOC100139670/gene-IFIT5/gene-EIF2AK2/gene-IRF7/gene-RNASEL/gene-IRF1/gene-IRF9/gene-STAT1/gene-STAT2/gene-TLR3/gene-IRF3/gene-IFNAR1
ko05162	Measles	1.97e-06	7.85e-05	gene-MX2/gene-OAS2/gene-TNFSF10/gene-OAS1Z/gene-IFIH1/gene-OAS1X/gene-MX1/gene-OAS1Y/gene-XAF1/gene-DDX58/gene-EIF2AK2/gene-IRF7/gene-ADAR/gene-IRF9/gene-STAT1/gene-STAT2/gene-TLR4/gene-IRF3/gene-TLR2/gene-IFNAR1/gene-BBC3
ko05133	Pertussis	3.86e-06	0.000134655	gene-XAF1/gene-C4A/gene-LOC107131209/gene-C2/gene-IRF8/gene-CASP7/gene-IRF1/gene-C1R/gene-IL23A/gene-SERPING1/gene-C1S/gene-TLR4/gene-CALN1/gene-IRF3/gene-FAM212A
ko04145	Phagosome	1.46e-05	0.000453619	gene-TAP1/gene-BOLA-DMB/gene-BOLA-NC1/gene-BoLA/gene-LOC512672/gene-NCF2/gene-BOLA/gene-JSP.1/gene-LOC616942/gene-C1R/gene-LOC618733/gene-FCGR1A/gene-TAP2/gene-CTSS/gene-MR1/gene-ATP6AP1L/gene-TLR4/gene-TLR2/gene-C5H22orf23/gene-LOC524181/gene-TUBB3
ko05012	Parkinson disease	3.99e-05	0.00111278	gene-UBA7/gene-UBE2L6/gene-COX7A1/gene-COX6B2/gene-COX1/gene-FAM212A/gene-ATP8/gene-ND1/gene-ND6/gene-ND5/gene-COX3/gene-ATP6/gene-ND2/gene-COX2/gene-ND3/gene-ND4/gene-CYTB/gene-ND4L
ko04623	Cytosolic DNA-sensing pathway	5.42e-05	0.00137495	gene-ZBP1/gene-DDX58/gene-CGAS/gene-IRF7/gene-ADAR/gene-TREX1/gene-RIPK3/gene-IRF3/gene-IL18/gene-LRRC73
ko00190	Oxidative phosphorylation	9.51e-05	0.00221048	gene-COX7A1/gene-ATP6AP1L/gene-C5H22orf23/gene-COX6B2/gene-COX1/gene-ATP8/gene-ND1/gene-ND6/gene-ND5/gene-COX3/gene-ATP6/gene-ND2/gene-COX2/gene-ND3/gene-ND4/gene-CYTB/gene-ND4L
ko05320	Autoimmune thyroid disease	0.00016171	0.00347055	gene-BOLA-DMB/gene-BOLA-NC1/gene-BoLA/gene-LOC512672/gene-BOLA/gene-JSP.1/gene-LOC616942/gene-MR1/gene-CD40/gene-WFIKKN1
ko05203	Viral carcinogenesis	0.000198753	0.00396086	gene-SP100/gene-SP140/gene-BOLA-NC1/gene-BoLA/gene-SP140L/gene-LOC512672/gene-SP110/gene-EIF2AK2/gene-BOLA/gene-CASP8/gene-IRF7/gene-GTF2B/gene-JSP.1/gene-LOC616942/gene-IRF9/gene-MR1/gene-PMAIP1/gene-IRF3/gene-KAT2A/gene-PHF21B/gene-HIST1H2BB/gene-H2B
ko05330	Allograft rejection	0.000219169	0.00407655	gene-BOLA-DMB/gene-BOLA-NC1/gene-BoLA/gene-LOC512672/gene-BOLA/gene-JSP.1/gene-LOC616942/gene-MR1/gene-CD40
ko05165	Human papillomavirus infection	0.000562331	0.00980564	gene-MX2/gene-ISG15/gene-MX1/gene-BOLA-NC1/gene-BoLA/gene-LOC512672/gene-EIF2AK2/gene-NOTCH3/gene-BOLA/gene-CASP8/gene-JSP.1/gene-LOC616942/gene-IRF1/gene-IRF9/gene-PPP2R3C/gene-STAT1/gene-STAT2/gene-MR1/gene-WNT6/gene-ATP6AP1L/gene-COL6A5/gene-TLR3/gene-IRF3/gene-C5H22orf23/gene-ITGB7/gene-IFNAR1/gene-APC2/gene-PHF21B/gene-TCF7/gene-LAMB3/gene-LOC112442278
ko05332	Graft-versus-host disease	0.000631577	0.0100958	gene-BOLA-DMB/gene-BOLA-NC1/gene-BoLA/gene-LOC512672/gene-BOLA/gene-JSP.1/gene-LOC616942/gene-MR1
ko05167	Kaposi sarcoma-associated herpesvirus infection	0.000651344	0.0100958	gene-BOLA-NC1/gene-BoLA/gene-LOC512672/gene-EIF2AK2/gene-BOLA/gene-CASP8/gene-IRF7/gene-JSP.1/gene-LOC616942/gene-IRF9/gene-STAT1/gene-STAT2/gene-MIC1/gene-MR1/gene-CALN1/gene-TLR3/gene-IRF3/gene-LOC112443864/gene-IFNAR1
ko04622	RIG-I-like receptor signaling pathway	0.000738266	0.0108409	gene-ISG15/gene-IFIH1/gene-XAF1/gene-DHX58/gene-DDX58/gene-CASP8/gene-IRF7/gene-TRIM25/gene-IRF3/gene-AZI2
ko05323	Rheumatoid arthritis	0.000792867	0.0110605	gene-BOLA-DMB/gene-TNFSF13B/gene-IL23A/gene-ANGPT1/gene-ATP6AP1L/gene-TLR4/gene-CCL2/gene-TLR2/gene-C5H22orf23/gene-IL18/gene-MMP3/gene-LOC112441463
ko05416	Viral myocarditis	0.00132959	0.0176646	gene-BOLA-DMB/gene-BOLA-NC1/gene-BoLA/gene-LOC512672/gene-BOLA/gene-CASP8/gene-JSP.1/gene-LOC616942/gene-MR1/gene-CD40/gene-CXADR
ko04940	Type I diabetes mellitus	0.00162208	0.0205709	gene-BOLA-DMB/gene-BOLA-NC1/gene-BoLA/gene-LOC512672/gene-BOLA/gene-JSP.1/gene-LOC616942/gene-MR1
ko04217	Necroptosis	0.00253523	0.0307534	gene-TNFSF10/gene-ZBP1/gene-RBM43/gene-EIF2AK2/gene-CASP8/gene-IRF9/gene-STAT1/gene-STAT2/gene-RBCK1/gene-TLR4/gene-RIPK3/gene-TLR3/gene-MLKL/gene-CHMP5/gene-IFNAR1/gene-HIST2H2AC
ko05144	Malaria	0.00395072	0.0459271	gene-TLR4/gene-CCL2/gene-CD40/gene-TLR2/gene-SDC1/gene-GYPC/gene-IL18/gene-HGF
